# Supplementary material for: Unique Amphibole Bearing Mantle Column Beneath the Lenin-Grad Kimberlite Pipe, West Ukukit field, NE Yakutia.
Source: Preprints.org preprint supplement (doi:10.20944/preprints202212.0134.v1), 2022-12-07
Supplement: Supplementary file 5 [file Experim Liter.docx]

Medard et al., 2006. Melting of Amphibole-bearing Wehrlites: an Experimental Study on the Origin of Ultra-calcic Nepheline-normative Melt. Journal of Petrology 47.

Niida, K.., Green, D. H. Stability and chemical composition of pargasitic amphibole in MORB pyrolite under upper mantle conditions. Contrib. Mineral. Petrol. 135.

Wallace M.E., Green D.H. 1991. The effect of bulk rock composition on the stability of amphibole in the upper mantle: implications for solidus positions and mantle metasomatism. Mineral. Petrol. 44

Fumagalli P., Zanchetta S. Poli S., 2009. Alkali in phlogopite and amphibole and their effects on phase relations in metasomatized peridotites: a high-pressure study. Contrib Mineral Petrol, 158:723–737.

Nandedkar R.H., Hürlimann N., Ulmer P., Müntener O. 2017. Amphibole–melt trace element partitioning of fractionating calc‑alkaline magmas in the lower crust: an experimental study. Contrib Mineral Petrol (2016) 171:71.

C. Sen, T. 1995. Experimental modal metasomatism of a spinel lherzolite and the production of amphibole-bearing peridotite. Dunn in Contributions to Mineralogy and Petrology. **119**,  422–432.

Mandler B.E., Grove T.L. 2016. Controls on the stability and composition of amphibole in the Earth’s mantle. Contributions to Mineralogy and Petrology volume 171, 68 .
