# Supplementary material for: Unique Amphibole Bearing Mantle Column Beneath the Lenin-Grad Kimberlite Pipe, West Ukukit field, NE Yakutia.
Source: Preprints.org preprint supplement (doi:10.20944/preprints202212.0134.v1), 2022-12-07
Supplement: Supplementary file 6 [file Supplementary file 4 Leningrad (1).doc]

| T0C | t, min | 40Ar, 10-9 cm3 STP | 40Ar/39Ar | ±1σ | 38Ar/39Ar | ±1σ | 37Ar/39Ar | ±1σ | 36Ar/39Ar | ±1σ | Ca/K | **∑**39Ar  (%) | Age, Ma | ±1σ |
| --- | --- | --- | --- | --- | --- | --- | --- | --- | --- | --- | --- | --- | --- | --- |
| **Ol-151 amphibole, phlogopite (5.14 mg)** | | | | | | | | | | | | | | |
| **J=0.004754±0.000059** | | | | | | | | | | | | | | |
| 500 | 10 | 24,4 | 59,99 | 0,42 | 0,1422 | 0,0049 | 6,316 | 4,687 | 0,1650 | 0,0048 | 22,7 | 19,1 | 93,9 | 11,4 |
| 600 | 10 | 18,5 | 67,36 | 0,65 | 0,1847 | 0,0038 | 26,374 | 7,109 | 0,1504 | 0,0058 | 94,9 | 31,9 | 186,5 | 13,2 |
| 800 | 10 | 39,6 | 116,25 | 1,05 | 0,1181 | 0,0039 | 18,925 | 6,434 | 0,2381 | 0,0060 | 68,1 | 47,9 | 356,1 | 12,6 |
| 925 | 10 | 67,7 | 131,11 | 0,28 | 0,1122 | 0,0020 | 0,004 | 0,022 | 0,2397 | 0,0022 | 0,01 | 72,1 | 454,6 | 6,6 |
| 1000 | 10 | 17,2 | 63,80 | 0,45 | 0,1426 | 0,0057 | 0,193 | 0,068 | 0,1249 | 0,0070 | 0,7 | 84,7 | 217,0 | 16,0 |
| 1130 | 10 | 87,9 | 269,50 | 2,33 | 0,0992 | 0,0036 | 18,328 | 3,691 | 0,1042 | 0,0077 | 66,0 | 100,0 | 1368,2 | 17,1 |
| **Ol-112 amphibole, phlogopite (1.93 mg)** | | | | | | | | | | | | | | |
| **J=0.004754±0.000059** | | | | | | | | | | | | | | |
| 500 | 10 | 9,7 | 15,23 | 0,05 | 0,0454 | 0,0021 | 2,558 | 1,645 | 0,0390 | 0,0026 | 9,2 | 19,7 | 31,6 | 6,6 |
| 650 | 10 | 8,5 | 29,38 | 0,22 | 0,0895 | 0,0041 | 21,253 | 3,102 | 0,0312 | 0,0065 | 76,5 | 28,6 | 165,1 | 15,1 |
| 850 | 10 | 24,4 | 57,19 | 0,20 | 0,0461 | 0,0016 | 7,061 | 1,722 | 0,0858 | 0,0030 | 25,4 | 41,7 | 254,3 | 7,3 |
| 1000 | 10 | 47,2 | 52,66 | 0,11 | 0,0305 | 0,0015 | 5,004 | 0,982 | 0,0149 | 0,0018 | 18,0 | 69,4 | 372,6 | 5,7 |
| 1150 | 10 | 54,2 | 54,64 | 0,12 | 0,0379 | 0,0008 | 2,963 | 0,757 | 0,0233 | 0,0020 | 10,7 | 100,0 | 369,0 | 5,9 |
| **Ol-203 phlogopite (5.02 mg)** | | | | | | | | | | | | | | |
| **J=0.004751±0.000059** | | | | | | | | | | | | | | |
| 600 | 10 | 37,2 | 131,37 | 0,87 | 0,1768 | 0,0056 | - | - | 0,3714 | 0,0101 | - | 2,4 | 176,4 | 22,6 |
| 700 | 10 | 170,5 | 203,70 | 0,35 | 0,1155 | 0,0009 | - | - | 0,3566 | 0,0027 | - | 9,5 | 691,5 | 8,5 |
| 750 | 10 | 111,2 | 390,93 | 2,39 | 0,0931 | 0,0057 | - | - | 0,1046 | 0,0097 | - | 11,9 | 1798,9 | 18,2 |
| 800 | 10 | 327,1 | 706,53 | 2,20 | 0,0785 | 0,0047 | - | - | 0,1364 | 0,0050 | - | 15,8 | 2574,0 | 17,8 |
| 850 | 10 | 509,0 | 760,01 | 1,63 | 0,0652 | 0,0023 | - | - | 0,0953 | 0,0051 | - | 21,5 | 2704,3 | 17,9 |
| 875 | 10 | 262,9 | 650,82 | 1,42 | 0,0495 | 0,0042 | - | - | 0,0434 | 0,0046 | - | 24,9 | 2515,0 | 17,3 |
| 925 | 10 | 424,1 | 706,09 | 1,40 | 0,0426 | 0,0006 | - | - | 0,0624 | 0,0032 | - | 30,0 | 2617,6 | 17,5 |
| 975 | 10 | 568,3 | 681,61 | 1,36 | 0,0511 | 0,0025 | - | - | 0,0374 | 0,0033 | - | 37,1 | 2582,9 | 17,4 |
| 1025 | 10 | 781,1 | 668,85 | 0,65 | 0,0452 | 0,0010 | - | - | 0,0387 | 0,0028 | - | 47,0 | 2555,8 | 17,1 |
| 1075 | 10 | 1532,6 | 713,96 | 0,37 | 0,0305 | 0,0007 | - | - | 0,0376 | 0,0012 | - | 65,2 | 2647,9 | 17,3 |
| 1130 | 10 | 2995,6 | 729,55 | 0,41 | 0,0279 | 0,0004 | - | - | 0,0313 | 0,0010 | - | 100,0 | 2682,0 | 17,4 |

40Ar/39Ar geochronological studies by the method of stepwise heating were carried out according to the methodology described in **(Travin A.V., Yudin D. S., Vladimirov A. G., Khromykh S. V., Volkova N. I., Mekhonoshin A. S., Kolotilina T. B. Thermochronology of the Chernorud granulite zone (Olkhon region, Western Baikal region). Geochemistry International. 2009. No. 11. pp. 1181-1199.** Minerals for 40Ar/39Ar isotope-geochronological studies were isolated using standard magnetic and density separation techniques. The attachments of mineral fractions together with the attachments of biotite MSA-11 (OSO No. 129-88) used as a monitor were wrapped in aluminum foil, placed in a quartz ampoule and sealed after pumping air out of it. Biotite MCA-11, prepared by VIMS in 1988 as a standard K/Ar sample, was certified as a 40Ar/39Ar monitor using international standard samples of muscovite Bern 4m, biotite LP-6 (**Baksi A.K., Archibald D.A., Farrar E. Intercalibration of 40Ar/39Ar dating standarts // Chemical Geology. 1996. V. 129. P. 307-324)**. As the integral age of the MCA-11 biotite, the average of the calibration results was taken to be 311.0 ± 1.5 million years.

The minerals (grains were 250-100 mm size) after magnetic separation and final hand picking have been wrapped in Al-foil, vacuum sealed in quartz vials and irradiated. K/Ar standard biotite MCA-11 calibrated with LP-6 biotite and MMhb-1 hornblende was put between every two samples for neutron gradient monitoring. A feature of the technique is the irradiation of quartz ampoules with samples in the channel of the research reactor of the Politechnical Institute at Tomsk (Russia), which is cooled by water. When irradiated under such conditions, the temperature of the ampoules with the samples does not exceed 100°C. 40Ar/39Ar step heating experiments were accomplished in a quartz reactor heated by external furnace. For temperature monitoring thermocouple was used. Released gases were purified by exposure to a Ti-getters and SAES getters. The Ar isotope composition was measured on multi-collector mass spectrometer ARGUS. 1200ºC blank of 40Ar deed not exceed n*10-9 cm3 STP.
